# Supplementary material
Source: MDPI journal article supplement (https://www.mdpi.com/1996-1073/16/7/3162)
Supplement: s1 [file s1]

Table S1: Classes of compounds, summation of peak areas, CAS number, and retention times of chemical compounds identified by CG-MS in bio-oil by pyrolysis of Açai seeds (*Euterpe Oleracea*, Mart), activated with 2.0 M KOH solution, at 350 °C, 1.0 atmosphere, in laboratory scale.

| Class of Compounds: Chemical Compounds               | RT [min] | CAS        | ωi% (Area)    |
|------------------------------------------------------|----------|------------|---------------|
| <b>Alcohol</b>                                       |          |            |               |
| 2-Furanmethanol                                      | 8.251    | 98-00-0    | 1.576         |
| 5-tert-Butylpyrogallol                               | 28.208   | 20481-17-8 | 2.627         |
| $\Sigma$ (Area.%) =                                  |          |            | <b>4.203</b>  |
| <b>Aromatic</b>                                      |          |            |               |
| Naphthalene, 1,2-dihydro-6-methyl-                   | 21.820   | 2717-47-7  | 1.387         |
| Toluene                                              | 6.147    | 108-88-3   | 2.08          |
| Bicyclo[4.2.0]octa-1,3,5-triene                      | 9.714    | 694-87-1   | 1.701         |
| $\Sigma$ (Area.%) =                                  |          |            | <b>5.168</b>  |
| <b>Cresol</b>                                        |          |            |               |
| p-Cresol                                             | 14.651   | 106-44-5   | 3.266         |
| p-Cresol                                             | 15.304   | 106-44-5   | 3.349         |
| $\Sigma$ (Area.%) =                                  |          |            | <b>6.615</b>  |
| <b>Cycloalkene</b>                                   |          |            |               |
| Cyclooctene, 1,2-dimethyl-                           | 19.063   | 54299-96-6 | 3.163         |
| $\Sigma$ (Area.%) =                                  |          |            | <b>3.163</b>  |
| <b>Ester</b>                                         |          |            |               |
| 10-Octadecenoic acid, methyl ester                   | 42.716   | 13481-95-3 | 2.103         |
| Pentadecanoic acid, 13-methyl-, methyl ester         | 37.015   | 5487-50-3  | 1.733         |
| Tridecanoic acid, 12-methyl-, methyl ester           | 32.819   | 5129-58-8  | 1.576         |
| $\Sigma$ (Area.%) =                                  |          |            | <b>5.412</b>  |
| <b>Hetrocyclic organic compound</b>                  |          |            |               |
| 5H-1-Pyridine                                        | 22.420   | 270-91-7   | 2.222         |
| $\Sigma$ (Area.%) =                                  |          |            | <b>2.222</b>  |
| <b>Hydrocarbon</b>                                   |          |            |               |
| Cyclohexene, 3,3,5-trimethyl-                        | 16.265   | 503-45-7   | 1.855         |
| $\Sigma$ (Area.%) =                                  |          |            | <b>1.855</b>  |
| <b>Ketone</b>                                        |          |            |               |
| 2-Cyclopenten-1-one, 2,3-dimethyl-                   | 12.943   | 1121-05-7  | 1.933         |
| 2-Cyclopenten-1-one, 2,3-dimethyl-                   | 14.255   | 1121-05-7  | 1.632         |
| 2-Cyclopenten-1-one, 2-methyl-                       | 10.000   | 1120-73-6  | 1.726         |
| 2-Cyclopenten-1-one, 3,4,4-trimethyl-                | 14.995   | 30434-65-2 | 2.199         |
| 2-Pentanone, 4-hydroxy-4-methyl-                     | 7.901    | 123-42-2   | 3.034         |
| 5H-Inden-5-one, 1,2,3,6,7,7a-hexahydro-7a-methyl-    | 17.682   | 17299-55-7 | 1.685         |
| $\Sigma$ (Area.%) =                                  |          |            | <b>12.209</b> |
| <b>Lactonas</b>                                      |          |            |               |
| Butyrolactone                                        | 10.105   | 96-48-0    | 4.454         |
| $\Sigma$ (Area.%) =                                  |          |            | <b>4.454</b>  |
| <b>Phenol</b>                                        |          |            |               |
| 2,3-Dimethoxybenzyl alcohol                          | 26.227   | 5653-67-8  | 2.244         |
| Benzenemethanol, $\alpha$ -methyl- $\alpha$ -propyl- | 22.869   | 4383-18-0  | 1.64          |
| 1,3-Benzenediol, 4-ethyl-                            | 19.151   | 2896-60-8  | 4.524         |
| Phenol                                               | 12.168   | 108-95-2   | 15.640        |
| Phenol, 2,6-dimethoxy-                               | 23.679   | 91-10-1    | 4.014         |

|                                         |        |            |         |
|-----------------------------------------|--------|------------|---------|
| Phenol, 2-methoxy-                      | 15.933 | 90-05-1    | 8.476   |
| Phenol, 2-methoxy-4-propyl-             | 24.187 | 2785-87-7  | 1.846   |
| Phenol, 2-methoxy-5-(1-propenyl)-, (E)- | 26.524 | 19784-98-6 | 1.816   |
| Phenol, 3-ethyl-                        | 17.280 | 620-17-7   | 3.031   |
| Phenol, 3-ethyl-                        | 18.201 | 620-17-7   | 3.840   |
| Phenol, 3-ethyl-5-methyl-               | 20.410 | 698-71-5   | 1.672   |
| Phenol, 4-ethyl-2-methoxy-              | 21.680 | 2785-89-9  | 3.127   |
| $\Sigma$ (Area.%) =                     |        |            | 51.870  |
| <b>Sequiterpenes</b>                    |        |            |         |
| Cedran-diol, 8S,13-                     | 27.999 | 88588-48-1 | 2.828   |
| $\Sigma$ (Area.%) =                     |        |            | 2.828   |
| <b>Total</b>                            |        |            | 100.000 |

Table S2: Classes of compounds, summation of peak areas, CAS number, and retention times of chemical compounds identified by CG-MS in bio-oil by pyrolysis of Açai seeds (*Euterpe Oleracea*, Mart), activated with 2.0 M KOH solution, at 400 °C, 1.0 atmosphere, in laboratory scale.

| Class of Compounds: Chemical Compounds                                       | RT [min] | CAS         | wi% (Area)   |
|------------------------------------------------------------------------------|----------|-------------|--------------|
| <b>Alcohol</b>                                                               |          |             |              |
| 1,1-Cyclopropanedimethanol, 2-methyl- $\alpha$ -phenyl-                      | 22.176   | 108546-96-9 | 1.814        |
| 2-Furanmethanol                                                              | 8.251    | 98-00-0     | 4.166        |
| $\Sigma$ (Area.%) =                                                          |          |             | <b>5.980</b> |
| <b>Alkane</b>                                                                |          |             |              |
| Decane                                                                       | 12.885   | 124-18-5    | 1.809        |
| Tridecane                                                                    | 22.076   | 629-50-5    | 2.433        |
| Undecane                                                                     | 16.079   | 1120-21-4   | 1.907        |
| $\Sigma$ (Area.%) =                                                          |          |             | <b>6.149</b> |
| <b>Amine</b>                                                                 |          |             |              |
| 4-(2,5-Dihydro-3-methoxyphenyl)butylamine                                    | 22.438   | 77515-67-4  | 2.888        |
| Phenethylamine, 2,4,5-trimethoxy- $\alpha$ -methyl-                          | 28.208   | 1083-09-6   | 1.974        |
| 2-Pentanone, 4-amino-4-methyl-                                               | 8.542    | 625-04-7    | 1.935        |
| $\Sigma$ (Area.%) =                                                          |          |             | <b>6.797</b> |
| <b>Aromatic</b>                                                              |          |             |              |
| Mesitylene                                                                   | 13.036   | 108-67-8    | 1.559        |
| Bicyclo[4.2.0]octa-1,3,5-triene                                              | 9.714    | 694-87-1    | 2.712        |
| $\Sigma$ (Area.%) =                                                          |          |             | <b>4.271</b> |
| <b>Carboxylic acid</b>                                                       |          |             |              |
| Butanoic acid, 4-hydroxy-                                                    | 10.104   | 591-81-1    | 2.144        |
| E-9-Tetradecenoic acid                                                       | 21.843   | 50286-30-1  | 3.189        |
| $\Sigma$ (Area.%) =                                                          |          |             | <b>5.333</b> |
| <b>Cresol</b>                                                                |          |             |              |
| p-Cresol                                                                     | 15.309   | 106-44-5    | 3.87         |
| $\Sigma$ (Area.%) =                                                          |          |             | <b>3.870</b> |
| <b>Cyclic alkene</b>                                                         |          |             |              |
| 1,3-Dimethyl-1-cyclohexene                                                   | 11.002   | 2808-76-6   | 0.902        |
| 1,5,5-Trimethyl-6-methylene-cyclohexene                                      | 18.981   | 514-95-4    | 1.862        |
| Cyclobutene, 2-propenylidene-                                                | 6.147    | 52097-85-5  | 2.140        |
| Cyclohexane                                                                  | 4.031    | 110-82-7    | 3.743        |
| $\Sigma$ (Area.%) =                                                          |          |             | <b>8.647</b> |
| <b>Ester</b>                                                                 |          |             |              |
| Acetic acid, 7-hydroxy-1,3,4,5,6,7-hexahydro-2H-naphthalen-4a-ylmethyl ester | 26.232   | -           | 1.824        |
| $\Sigma$ (Area.%) =                                                          |          |             | <b>1.824</b> |
| <b>Fatty Alcohol</b>                                                         |          |             |              |
| 1-Hexadecanol, 2-methyl-                                                     | 32.399   | 2490-48-4   | 1.708        |
| $\Sigma$ (Area.%) =                                                          |          |             | <b>1.708</b> |
| <b>Ketone</b>                                                                |          |             |              |
| 2-Cyclopenten-1-one, 2,3-dimethyl-                                           | 14.260   | 1121-05-7   | 2.845        |
| 2-Cyclopenten-1-one, 3,4,4-trimethyl-                                        | 14.995   | 30434-65-2  | 1.814        |
| 2-Pentanone, 4-hydroxy-4-methyl-                                             | 7.901    | 123-42-2    | 2.883        |
| Cyclopentanone, 2-ethyl-                                                     | 11.154   | 4971-18-0   | 1.291        |
| $\Sigma$ (Area.%) =                                                          |          |             | <b>8.833</b> |

|                                |        |             |                |
|--------------------------------|--------|-------------|----------------|
| <b>Phenol</b>                  |        |             |                |
| Phenol                         | 12.168 | 108-95-2    | 9.050          |
| Phenol, 2,3,5-trimethyl-       | 19.623 | 697-82-5    | 1.829          |
| Phenol, 2,4,6-trimethyl-       | 20.526 | 527-60-6    | 2.023          |
| Phenol, 2,4-dimethyl-          | 17.699 | 105-67-9    | 5.675          |
| Phenol, 2,6-dimethoxy-         | 23.679 | 91-10-1     | 2.919          |
| Phenol, 2-methoxy-             | 15.933 | 90-05-1     | 6.092          |
| Phenol, 2-methyl-              | 14.657 | 95-48-7     | 3.743          |
| Phenol, 3-ethyl-               | 17.280 | 620-17-7    | 3.115          |
| Phenol, 3-ethyl-               | 18.200 | 620-17-7    | 3.193          |
| Phenol, 4-ethyl-2-methoxy-     | 21.686 | 2785-89-9   | 3.612          |
| $\Sigma$ (Area.%) =            |        |             | <b>41.251</b>  |
| <b>Sequiterpenes</b>           |        |             |                |
| Tetradecane, 2,6,10-trimethyl- | 27.433 | 14905-56-7  | 1.990          |
| 1,4-Dihydrothujopsene-(II)     | 19.156 | 159087-74-8 | 3.346          |
| $\Sigma$ (Area.%) =            |        |             | <b>5.336</b>   |
| <b>Total</b>                   |        |             | <b>100.000</b> |

Table S3: Classes of compounds, summation of peak areas, CAS number, and retention times of chemical compounds identified by CG-MS in bio-oil by pyrolysis of Açai seeds (*Euterpe Oleracea*, Mart), activated with 2.0 M KOH solution, at 450 °C, 1.0 atmosphere, in laboratory scale.

| Class of Compounds: Chemical Compounds                                           | RT [min] | CAS        | wi% (Area)   |
|----------------------------------------------------------------------------------|----------|------------|--------------|
| <b>Alcohol</b>                                                                   |          |            |              |
| 2,3,4,5,6-Pentamethyl benzyl alcohol                                             | 26.279   | -          | 1.738        |
| 2-Furanmethanol                                                                  | 8.257    | 98-00-0    | 1.578        |
| Benzenemethanol, $\alpha$ -ethyl-4-methoxy-                                      | 24.181   | 5349-60-0  | 1.805        |
| Cyclohexanol, 5-methyl-2-(1-methylethyl)-, (1 $\alpha$ ,2 $\alpha$ ,5 $\beta$ )- | 19.156   | 491-01-0   | 3.798        |
| $\Sigma$ (Area.%) =                                                              |          |            | <b>8.919</b> |
| <b>Alkane</b>                                                                    |          |            |              |
| Decane                                                                           | 12.891   | 124-18-5   | 1.234        |
| Nonadecane                                                                       | 27.433   | 629-92-5   | 1.518        |
| Tetradecane                                                                      | 24.833   | 629-59-4   | 2.332        |
| Tridecane                                                                        | 22.071   | 629-50-5   | 2.595        |
| Undecane                                                                         | 16.085   | 1120-21-4  | 1.590        |
| $\Sigma$ (Area.%) =                                                              |          |            | <b>9.269</b> |
| <b>Alkene</b>                                                                    |          |            |              |
| 7-Tetradecene                                                                    | 21.849   | 10374-74-0 | 2.863        |
| $\Sigma$ (Area.%) =                                                              |          |            | <b>2.863</b> |
| <b>Amine</b>                                                                     |          |            |              |
| 4-(2,5-Dihydro-3-methoxyphenyl)butylamine                                        | 22.438   | 77515-67-4 | 2.445        |
| $\Sigma$ (Area.%) =                                                              |          |            | <b>2.445</b> |
| <b>Aromatic</b>                                                                  |          |            |              |
| Bicyclo[4.2.0]octa-1,3,5-triene                                                  | 9.714    | 694-87-1   | 3.126        |
| Ethylbenzene                                                                     | 8.764    | 100-41-4   | 2.214        |
| Toluene                                                                          | 6.147    | 108-88-3   | 1.946        |
| $\Sigma$ (Area.%) =                                                              |          |            | <b>7.286</b> |
| <b>Carboxylic acid</b>                                                           |          |            |              |
| Butanoic acid, 4-hydroxy-                                                        | 10.105   | 591-81-1   | 0.973        |
| $\Sigma$ (Area.%) =                                                              |          |            | <b>0.973</b> |
| <b>Cresol</b>                                                                    |          |            |              |
| p-Cresol                                                                         | 15.304   | 106-44-5   | 3.004        |
| $\Sigma$ (Area.%) =                                                              |          |            | <b>3.004</b> |
| <b>Cyclic hydrocarbon</b>                                                        |          |            |              |
| 1,2,4,4-Tetramethylcyclopentene                                                  | 14.995   | 65378-76-9 | 1.302        |
| 1,3-Cyclopentadiene, 5-(1-methylpropylidene)-                                    | 13.025   | 04.02.3141 | 0.891        |
| Cyclohexane                                                                      | 4.025    | 110-82-7   | 3.245        |
| Cyclohexane, 1,2,4-tris(methylene)-                                              | 11.894   | 14296-81-2 | 0.856        |
| $\Sigma$ (Area.%) =                                                              |          |            | <b>6.294</b> |
| <b>Ester</b>                                                                     |          |            |              |
| Acetic acid, 7-hydroxy-1,3,4,5,6,7-hexahydro-2H-naphthalen-4a-ylmethyl ester     | 25.778   | -          | 1.287        |
| $\Sigma$ (Area.%) =                                                              |          |            | <b>1.287</b> |
| <b>Fatty Alcohol</b>                                                             |          |            |              |
| 1-Hexadecanol, 2-methyl-                                                         | 32.405   | 2490-48-4  | 1.508        |
| $\Sigma$ (Area.%) =                                                              |          |            | <b>1.508</b> |
| <b>Ketone</b>                                                                    |          |            |              |
| 2-Cyclopenten-1-one, 2,3-dimethyl-                                               | 14.260   | 1121-05-7  | 1.855        |

|                                                                     |        |             |         |
|---------------------------------------------------------------------|--------|-------------|---------|
| 2-Cyclopenten-1-one, 2-methyl-                                      | 10.000 | 1120-73-6   | 0.904   |
| 4-(3,7,7-Trimethyl-2-oxabicyclo[3.2.0]hept-3-en-1-yl)but-3-en-2-one | 22.176 | 54686-00-9  | 1.449   |
| 4-(3,7,7-Trimethyl-2-oxabicyclo[3.2.0]hept-3-en-1-yl)but-3-en-2-one | 24.041 | 54686-00-9  | 1.567   |
| Spiro[2.3]hexan-5-one, 4,4-diethyl-                                 | 16.265 | -           | 1.293   |
| $\Sigma$ (Area.%) =                                                 |        |             | 7.068   |
| <b>Nitrile</b>                                                      |        |             |         |
| Tricyclo[3.1.0.0(2,4)]hex-3-ene-3-carbonitrile                      | 12.681 | 103495-51-8 | 1.94    |
| $\Sigma$ (Area.%) =                                                 |        |             | 1.94    |
| <b>Phenol</b>                                                       |        |             |         |
| Phenol                                                              | 12.168 | 108-95-2    | 5.731   |
| Phenol, 2,3,5-trimethyl-                                            | 20.514 | 697-82-5    | 1.967   |
|                                                                     | 16.586 | 526-75-0    | 1.369   |
| Phenol, 2,3-dimethyl-                                               | 17.693 | 526-75-0    | 4.757   |
| Phenol, 2,4,5-trimethyl-                                            | 21.406 | 496-78-6    | 1.684   |
| Phenol, 2,4,6-trimethyl-                                            | 19.617 | 527-60-6    | 1.752   |
| Phenol, 2,4,6-trimethyl-                                            | 21.523 | 527-60-6    | 1.504   |
| Phenol, 2,5-dimethyl-                                               | 18.643 | 95-87-4     | 1.234   |
| Phenol, 2,5-dimethyl-                                               | 18.982 | 95-87-4     | 1.964   |
| Phenol, 2,6-dimethoxy-                                              | 23.685 | 91-10-1     | 2.896   |
| Phenol, 2-ethyl-4-methyl-                                           | 21.004 | 3855-26-3   | 1.580   |
| Phenol, 2-methyl-                                                   | 14.657 | 95-48-7     | 2.594   |
| Phenol, 3,5-dimethyl-                                               | 18.305 | 108-68-9    | 1.785   |
| Phenol, 3-ethyl-                                                    | 18.206 | 620-17-7    | 2.602   |
| Phenol, 3-ethyl-5-methyl-                                           | 20.071 | 698-71-5    | 1.580   |
| Phenol, 4-ethyl-                                                    | 17.285 | 123-07-9    | 1.714   |
| Phenol, 4-ethyl-2-methoxy-                                          | 21.680 | 2785-89-9   | 2.935   |
| Phenol, 4-ethyl-2-methyl-                                           | 20.415 | 2219-73-0   | 1.683   |
| $\Sigma$ (Area.%) =                                                 |        |             | 41.331  |
| <b>Terpenoid</b>                                                    |        |             |         |
| Ascaridole epoxide                                                  | 22.863 | 135760-25-7 | 2.28    |
| $\Sigma$ (Area.%) =                                                 |        |             | 2.28    |
| <b>Non identified fraction</b>                                      |        |             |         |
| Mequinol                                                            | 15.933 | 150-76-5    | 3.532   |
| $\Sigma$ (Area.%) =                                                 |        |             | 3.532   |
| <b>Total</b>                                                        |        |             | 100.000 |

Table S4: Classes of compounds, summation of peak areas, CAS number, and retention times of chemical compounds identified by CG-MS in aqueous phase by pyrolysis of Açai seeds (*Euterpe Oleracea*, Mart), activated with 2.0 M KOH solution, at 350 °C, 1.0 atmosphere, in laboratory scale.

| Class of Compounds: Chemical Compounds     | RT [min] | CAS         | $\omega_i\%$ (Area) |
|--------------------------------------------|----------|-------------|---------------------|
| <b>Alcohol</b>                             |          |             |                     |
| 2-Furanmethanol                            | 8.251    | 98-00-0     | 2.336               |
| $\Sigma$ (Area.%) =                        |          |             | <b>2.336</b>        |
| <b>Amine</b>                               |          |             |                     |
| N-Isopropylcyclohexylamine                 | 18.422   | 1195-42-2   | 29.124              |
| $\Sigma$ (Area.%) =                        |          |             | <b>29.124</b>       |
| <b>Carboxylic acid</b>                     |          |             |                     |
| Acetic acid, hydrazide                     | 3.851    | 1068-57-1   | 4.046               |
| $\Sigma$ (Area.%) =                        |          |             | <b>4.046</b>        |
| <b>Ketone</b>                              |          |             |                     |
| 2-Pentanone, 4-amino-4-methyl-             | 8.543    | 625-04-7    | 15.919              |
| 2-Propanone, (1-methylethylidene)hydrazone | 8.700    | 627-70-3    | 15.122              |
| Butyrolactone                              | 10.111   | 96-48-0     | 3.132               |
| 1,2,3-Trimethylpiperidin-4-one             | 15.420   | -           | 14.578              |
| 4-Piperidinone, 2,2,6,6-tetramethyl-       | 16.907   | 826-36-8    | 4.06                |
| $\Sigma$ (Area.%) =                        |          |             | <b>52.811</b>       |
| <b>Oxazole</b>                             |          |             |                     |
| Oxazole, 4,5-dihydro-2,4,4-trimethyl-      | 6.369    | 1772-43-6   | 3.524               |
| $\Sigma$ (Area.%) =                        |          |             | <b>3.524</b>        |
| <b>Phenol</b>                              |          |             |                     |
| Phenol                                     | 12.191   | 108-95-2    | 4.452               |
| $\Sigma$ (Area.%) =                        |          |             | <b>4.452</b>        |
| <b>Silane</b>                              |          |             |                     |
| (N-Methylcarbamoyloxymethyl)trivinylsilane | 7.319    | 120491-41-0 | 3.706               |
| $\Sigma$ (Area.%) =                        |          |             | <b>3.706</b>        |
| <b>Total</b>                               |          |             | <b>100.000</b>      |

Table S5: Classes of compounds, summation of peak areas, CAS number, and retention times of chemical compounds identified by CG-MS in aqueous phase by pyrolysis of Açai seeds (*Euterpe Oleracea*, Mart), activated with 2.0 M KOH solution, at 400 °C, 1.0 atmosphere, in laboratory scale.

| Class of Compounds: Chemical Compounds       | RT [min] | CAS        | wi% (Area)     |
|----------------------------------------------|----------|------------|----------------|
| <b>Alcohol</b>                               |          |            |                |
| 2-Furanmethanol                              | 8.257    | 98-00-0    | 15.587         |
| Cyclopropyl carbinol                         | 16.184   | 2516-33-8  | 5.148          |
| $\Sigma$ (Area.%) =                          |          |            | <b>20.735</b>  |
| <b>Amine</b>                                 |          |            |                |
| 2-Propen-1-amine, N,N-bis(1-methylethyl)-    | 15.420   | 44898-60-4 | 5.300          |
| $\Sigma$ (Area.%) =                          |          |            | <b>5.300</b>   |
| <b>Aziridin</b>                              |          |            |                |
| Aziridine, 1,2-diisopropyl-3-methyl-, trans- | 18.422   | 6124-84-1  | 3.490          |
| $\Sigma$ (Area.%) =                          |          |            | <b>3.490</b>   |
| <b>Carboxylic acid</b>                       |          |            |                |
| Butanoic acid, 4-hydroxy-                    | 10.110   | 591-81-1   | 15.020         |
| $\Sigma$ (Area.%) =                          |          |            | <b>15.020</b>  |
| <b>Ketone</b>                                |          |            |                |
| 2-Pentanone, 4-amino-4-methyl-               | 8.543    | 625-04-7   | 11.560         |
| 2-Propanone, (1-methylethylidene)hydrazone   | 8.694    | 627-70-3   | 3.550          |
| 4-Piperidinone, 2,2,6,6-tetramethyl-         | 16.895   | 826-36-8   | 4.585          |
| $\Sigma$ (Area.%) =                          |          |            | <b>19.695</b>  |
| <b>Oxazole</b>                               |          |            |                |
| Oxazole, 4,5-dihydro-2,4,4-trimethyl-        | 6.374    | 1772-43-6  | 32.78          |
| 5-Amino-3,4-dimethyl-isoxazole               | 7.319    | 19947-75-2 | 2.980          |
| $\Sigma$ (Area.%) =                          |          |            | <b>35.76</b>   |
| <b>Total</b>                                 |          |            | <b>100.000</b> |



Table S6: Classes of compounds, summation of peak areas, CAS number, and retention times of chemical compounds identified by CG-MS in aqueous phase by pyrolysis of Açaí seeds (*Euterpe Oleracea*, Mart), activated with 2.0 M KOH solution, at 450 °C, 1.0 atmosphere, in laboratory scale.

| Class of Compounds: Chemical Compounds                     | RT [min] | CAS        | wi% (Area)     |
|------------------------------------------------------------|----------|------------|----------------|
| <b>Alcohol</b>                                             |          |            |                |
| 2,4-Dimethyl-2-oxazoline-4-methanol                        | 6.368    | 39986-37-3 | 17.670         |
| 3-Furanmethanol                                            | 8.257    | 4412-91-3  | 8.948          |
| $\Sigma$ (Area.%) =                                        |          |            | <b>26.618</b>  |
| <b>Alkene</b>                                              |          |            |                |
| 2-Pentene, 2,4-dimethyl-                                   | 6.735    | 625-65-0   | 3.394          |
| $\Sigma$ (Area.%) =                                        |          |            | <b>3.394</b>   |
| <b>Amine</b>                                               |          |            |                |
| N-Tert.-butyl-N-(2-propenyl)amine                          | 13.030   | 16486-68-3 | 6.054          |
| 2-Propen-1-amine, N,N-bis(1-methylethyl)-                  | 15.426   | 44898-60-4 | 3.620          |
| $\Sigma$ (Area.%) =                                        |          |            | <b>9.674</b>   |
| <b>Aziridine</b>                                           |          |            |                |
| Aziridine, 2-(1,1-dimethylethyl)-1-ethyl-3-methyl-, trans- | 18.416   | 55669-79-9 | 3.381          |
| $\Sigma$ (Area.%) =                                        |          |            | <b>3.381</b>   |
| <b>Carboxylic acid</b>                                     |          |            |                |
| Butanedioic acid, methylene-                               | 7.313    | 97-65-4    | 2.487          |
| Butanoic acid, 4-hydroxy-                                  | 10.104   | 591-81-1   | 6.743          |
| $\Sigma$ (Area.%) =                                        |          |            | <b>9.230</b>   |
| <b>Ester</b>                                               |          |            |                |
| Carbamic acid, phenyl ester                                | 12.191   | 622-46-8   | 3.316          |
| $\Sigma$ (Area.%) =                                        |          |            | <b>3.316</b>   |
| <b>Ketone</b>                                              |          |            |                |
| 2-Pentanone, 4-amino-4-methyl-                             | 8.531    | 625-04-7   | 32.541         |
| 2-Propanone, (1-methylethylidene)hydrazone                 | 8.700    | 627-70-3   | 2.292          |
| 4-Piperidinone, 2,2,6,6-tetramethyl-                       | 16.901   | 826-36-8   | 9.553          |
| $\Sigma$ (Area.%) =                                        |          |            | <b>44.386</b>  |
| <b>Total</b>                                               |          |            | <b>100.000</b> |

Table S7: Classes of compounds, summation of peak areas, CAS number, and retention times of chemical compounds identified by CG-MS in bio-oil by pyrolysis of Açaí seeds (*Euterpe Oleracea*, Mart), activated with 2.0 M HCl solution, at 350 °C, 1.0 atmosphere, in laboratory scale.

| Class of Compounds: Chemical Compounds | RT [min] | CAS        | wi% (Area)    |
|----------------------------------------|----------|------------|---------------|
| <b>Alcohol</b>                         |          |            |               |
| cis-1,2-Cyclohexanediol                | 20.853   | 1792-81-0  | 1.863         |
| $\Sigma$ (Area.%) =                    |          |            | <b>1.863</b>  |
| <b>Aldehyde</b>                        |          |            |               |
| Furfural                               | 7.761    | 98-01-1    | 6.372         |
| 2-Furancarboxaldehyde, 5-methyl-       | 11.766   | 620-02-0   | 2.763         |
| $\Sigma$ (Area.%) =                    |          |            | <b>9.135</b>  |
| <b>Carboxylic acid</b>                 |          |            |               |
| Benzoic acid                           | 17.956   | 65-85-0    | 2.784         |
| Dodecanoic acid                        | 28.850   | 143-07-7   | 15.592        |
| Tetradecanoic acid                     | 33.442   | 544-63-8   | 27.058        |
| Oleic Acid                             | 37.960   | 112-80-1   | 7.622         |
| $\Sigma$ (Area.%) =                    |          |            | <b>53.056</b> |
| <b>Phenol</b>                          |          |            |               |
| Phenol                                 | 12.168   | 108-95-2   | 17.655        |
| Phenol, 2-methoxy-                     | 15.933   | 90-05-1    | 3.498         |
| Phenol, 4-ethyl-2-methoxy-             | 21.680   | 2785-89-9  | 3.094         |
| Phenol, 2,6-dimethoxy-                 | 23.680   | 91-10-1    | 3.144         |
| 3,5-Dimethoxy-4-hydroxytoluene         | 26.215   | 07.05.6638 | 2.238         |
| Creosol                                | 19.151   | 93-51-6    | 3.368         |
| 1,2-Benzenediol, 4-methyl-             | 21.849   | 452-86-8   | 2.948         |
| $\Sigma$ (Area.%) =                    |          |            | <b>35.945</b> |
| <b>Total</b>                           |          |            | <b>100</b>    |

Table S8: Classes of compounds, summation of peak areas, CAS number, and retention times of chemical compounds identified by CG-MS in bio-oil by pyrolysis of Açai seeds (*Euterpe Oleracea*, Mart), activated with 2.0 M HCl solution, at 400 °C, 1.0 atmosphere, in laboratory scale.

| Class of Compounds: Chemical Compounds      | RT [min] | CAS        | wt% (Area)   |
|---------------------------------------------|----------|------------|--------------|
| <b>Alcohol</b>                              |          |            |              |
| cis-1,2-Cyclohexanediol                     | 20.853   | 1792-81-0  | 2.26         |
| 2-Pentanone, 1-(2,4,6-trihydroxyphenyl)     | 33.804   | -          | 2.36         |
| $\Sigma$ (Area.%) =                         |          |            | <b>4.62</b>  |
| <b>Aldehyde</b>                             |          |            |              |
| Furfural                                    | 7.762    | 98-01-1    | 5.31         |
| 2-Furancarboxaldehyde, 5-methyl-            | 11.766   | 620-02-0   | 2.05         |
| $\Sigma$ (Area.%) =                         |          |            | <b>7.36</b>  |
| <b>Carboxylic acid</b>                      |          |            |              |
| Benzoic acid                                | 17.944   | 65-85-0    | 2.46         |
| Dodecanoic acid                             | 28.844   | 143-07-7   | 11.86        |
| Tetradecanoic acid                          | 33.443   | 544-63-8   | 22.49        |
| Oleic Acid                                  | 37.954   | 112-80-1   | 6.73         |
| $\Sigma$ (Area.%) =                         |          |            | <b>43.54</b> |
| <b>Cresol</b>                               |          |            |              |
| p-Cresol                                    | 15.304   | 106-44-5   | 2.87         |
| $\Sigma$ (Area.%) =                         |          |            | <b>2.87</b>  |
| <b>Ketone</b>                               |          |            |              |
| 2-Cyclopenten-1-one, 2-methyl-              | 10.000   | 1120-73-6  | 0.69         |
| Ethanone, 1-(2-furanyl)-                    | 10.099   | 1192-62-7  | 1.65         |
| Levogluconone                               | 16.708   | 37112-31-5 | 2.39         |
| 2-Propanone, 1-(4-hydroxy-3-methoxyphenyl)- | 28.447   | 2503-46-0  | 1.86         |
| $\Sigma$ (Area.%) =                         |          |            | <b>6.59</b>  |
| <b>Phenol</b>                               |          |            |              |
| Phenol                                      | 12.162   | 108-95-2   | 14.26        |
| Phenol, 2-methoxy-                          | 15.933   | 90-05-1    | 3.58         |
| Creosol                                     | 19.151   | 93-51-6    | 4.43         |
| Phenol, 2,6-dimethoxy-                      | 23.680   | 91-10-1    | 2.9          |
| Phenol, 4-methoxy-3-(methoxymethyl)-        | 26.215   | 59907-65-2 | 2.08         |
| 1,2-Benzenediol, 4-methyl-                  | 21.855   | 452-86-8   | 2.52         |
| Butyrovannillone                            | 29.928   | 64142-23-0 | 2.93         |
| $\Sigma$ (Area.%) =                         |          |            | <b>32.70</b> |
| <b>Sesquiterpenes</b>                       |          |            |              |
| Tetradecane, 2,6,10-trimethyl-              | 27.427   | 14905-56-7 | 2.34         |
| $\Sigma$ (Area.%) =                         |          |            | <b>2.34</b>  |
| <b>Total</b>                                |          |            | <b>100</b>   |

Table S9: Classes of compounds, summation of peak areas, CAS number, and retention times of chemical compounds identified by CG-MS in bio-oil by pyrolysis of Açai seeds (*Euterpe Oleracea*, Mart), activated with 2.0 M HCl solution, at 450 °C, 1.0 atmosphere, in laboratory scale.

| Class of Compounds: Chemical Compounds | RT [min] | CAS        | wi% (Area)    |
|----------------------------------------|----------|------------|---------------|
| <b>Aldehyde</b>                        |          |            |               |
| Furfural                               | 7.761    | 98-01-1    | 4.078         |
| $\Sigma$ (Area.%) =                    |          |            | <b>4.078</b>  |
| <b>Carboxylic acid</b>                 |          |            |               |
| Dodecanoic acid                        | 28.855   | 143-07-7   | 14.41         |
| Tetradecanoic acid                     | 33.448   | 544-63-8   | 29.405        |
| n-Hexadecanoic acid                    | 37.948   | 57-10-3    | 12.185        |
| Oleic Acid                             | 43.986   | 112-80-1   | 5.175         |
| $\Sigma$ (Area.%) =                    |          |            | <b>61.175</b> |
| <b>Cresol</b>                          |          |            |               |
| p-Cresol                               | 15.298   | 106-44-5   | 2.886         |
| $\Sigma$ (Area.%) =                    |          |            | <b>2.886</b>  |
| <b>Ketone</b>                          |          |            |               |
| Levogluconone                          | 16.708   | 37112-31-5 | 3.178         |
| $\Sigma$ (Area.%) =                    |          |            | <b>3.178</b>  |
| <b>Phenol</b>                          |          |            |               |
| Phenol                                 | 12.168   | 108-95-2   | 12.696        |
| Phenol, 2-methyl-                      | 14.651   | 95-48-7    | 1.882         |
| Phenol, 2-methoxy-                     | 15.933   | 90-05-1    | 2.861         |
| Phenol, 4-ethyl-2-methoxy-             | 21.680   | 2785-89-9  | 2.085         |
| Catechol                               | 19.016   | 120-80-9   | 3.236         |
| Creosol                                | 19.151   | 93-51-6    | 3.331         |
| 1,2-Benzenediol, 4-methyl-             | 21.849   | 452-86-8   | 2.591         |
| $\Sigma$ (Area.%) =                    |          |            | <b>28.682</b> |
| <b>Total</b>                           |          |            | <b>100</b>    |
